# Supplementary material for: Highly selective and sensitive chromogenic recognition of sarin gas mimicking diethylchlorophosphate
Source: Royal Society of Chemistry journal article supplement (doi:10.1039/d3ay02306k), 2024-01-01
Supplement: d3ay02306k1.pdf [file d3ay02306k1.pdf]

*Supporting Information for*

**Highly Selective and Sensitive Chromogenic Recognition of Sarin Gas Mimicking  
Diethylchlorophosphate**

Manas Mahato<sup>a</sup>, Tuhina Sultana<sup>a</sup>, Arpita Maiti<sup>a</sup>, Sabbir Ahamed<sup>a</sup>, Najmin Tohora<sup>a</sup>, Susanat  
Ghanta<sup>b</sup> and Sudhir Kumar Das<sup>a\*</sup>

<sup>a</sup>Department of Chemistry, University of North Bengal, Raja Rammohunpur, Darjeeling,  
West Bengal-734013, India

<sup>b</sup>Department of Chemistry, National Institute of Technology, Agartala, Barjala, Jirania,  
Tripura-799046, India

Corresponding author: (Dr. S. K. Das; E-mail: [sudhirkumardas@nbu.ac.in](mailto:sudhirkumardas@nbu.ac.in))

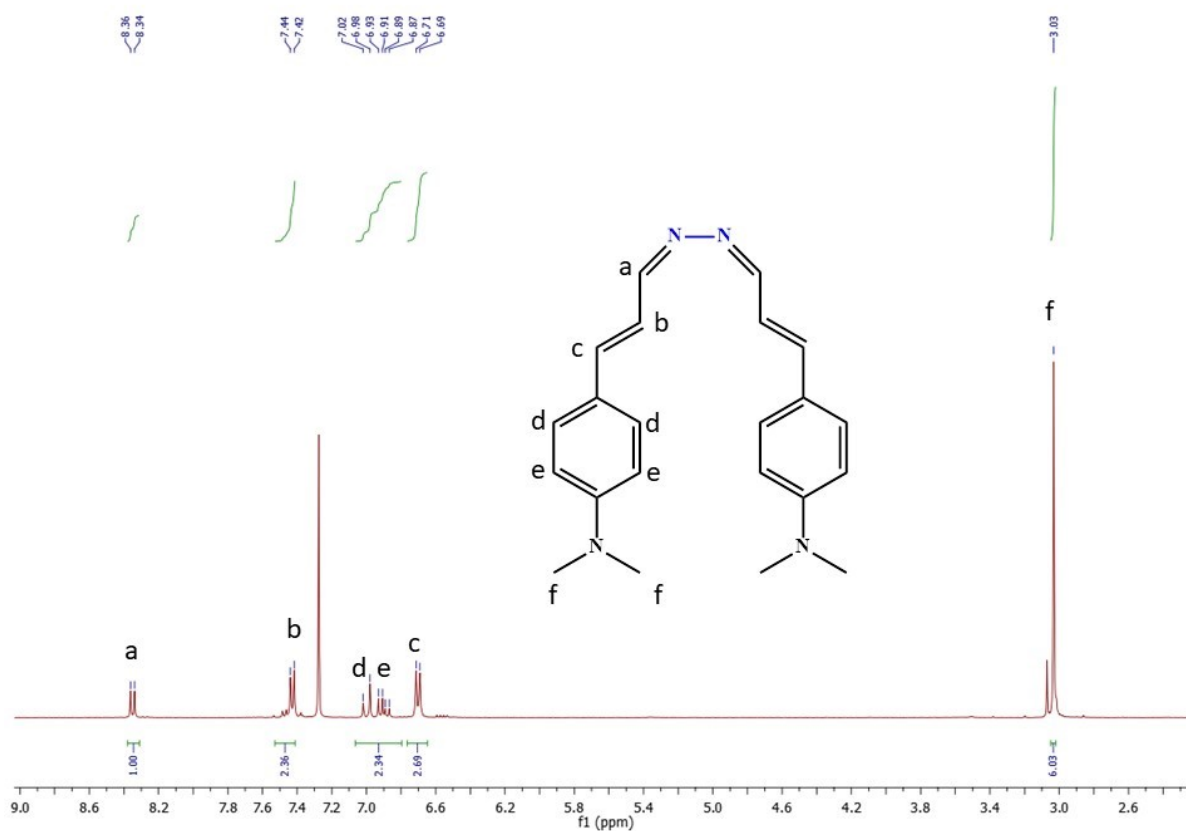

**Fig. S1**  $^1\text{H}$  NMR of our synthesized chemosensor **HBD**

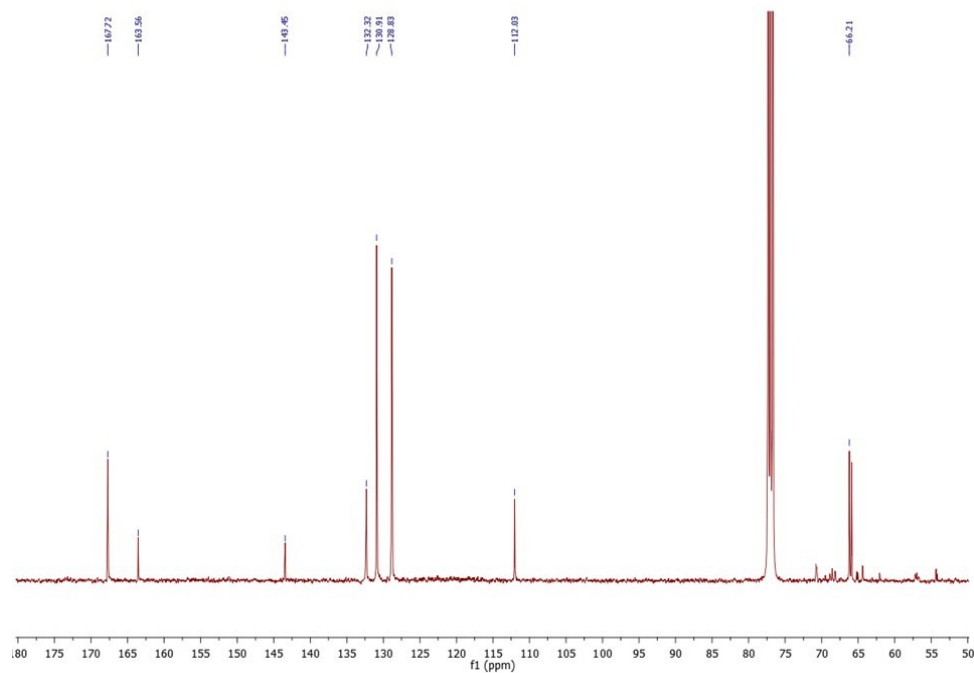

**Fig. S2**  $^{13}\text{C}$  NMR of our synthesized chemosensor **HBD**

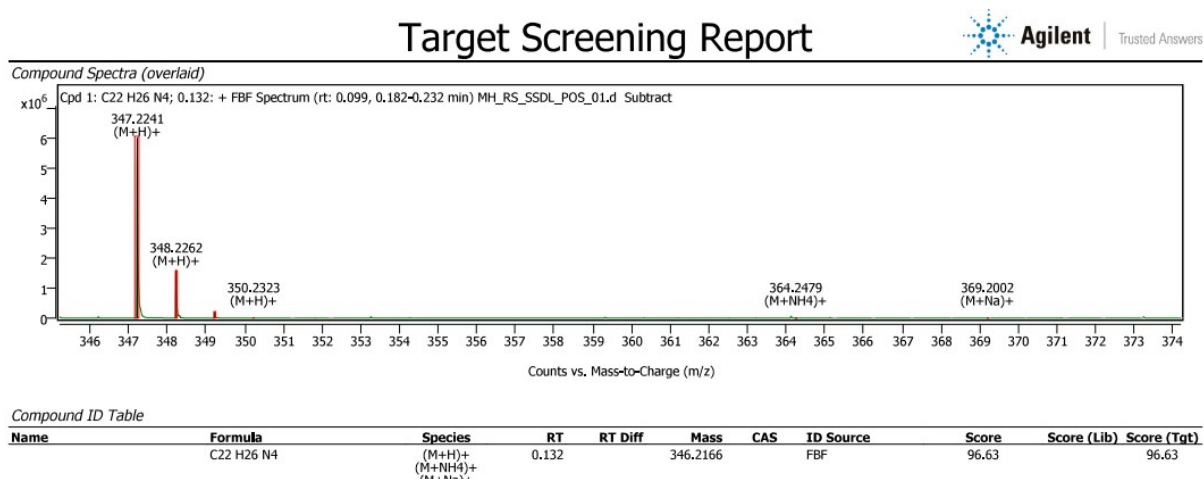

**Fig. S3** HRMS spectra of our developed **HBD**

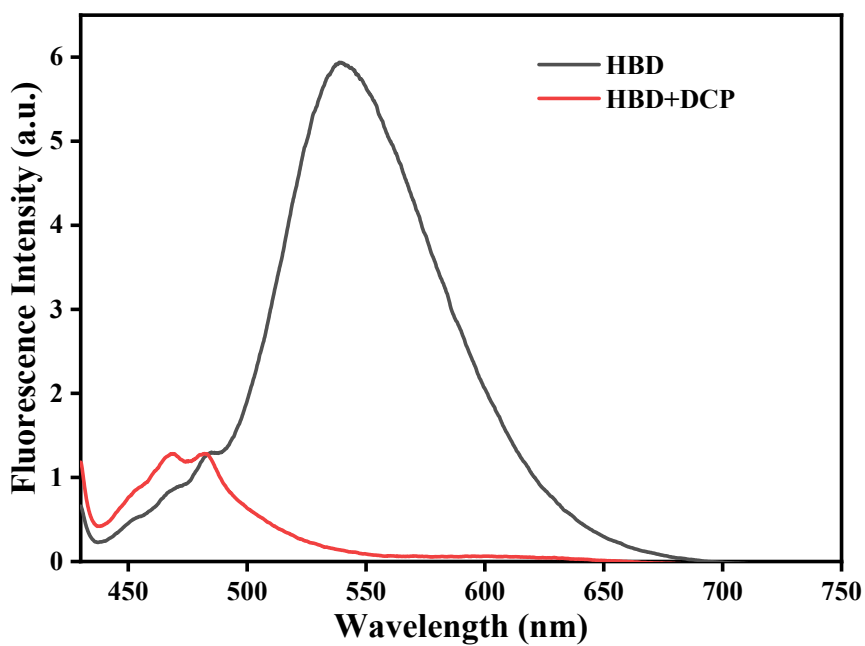

Fig. S4 Fluorometric investigation of our probe **HBD** absence and presence of DCP.

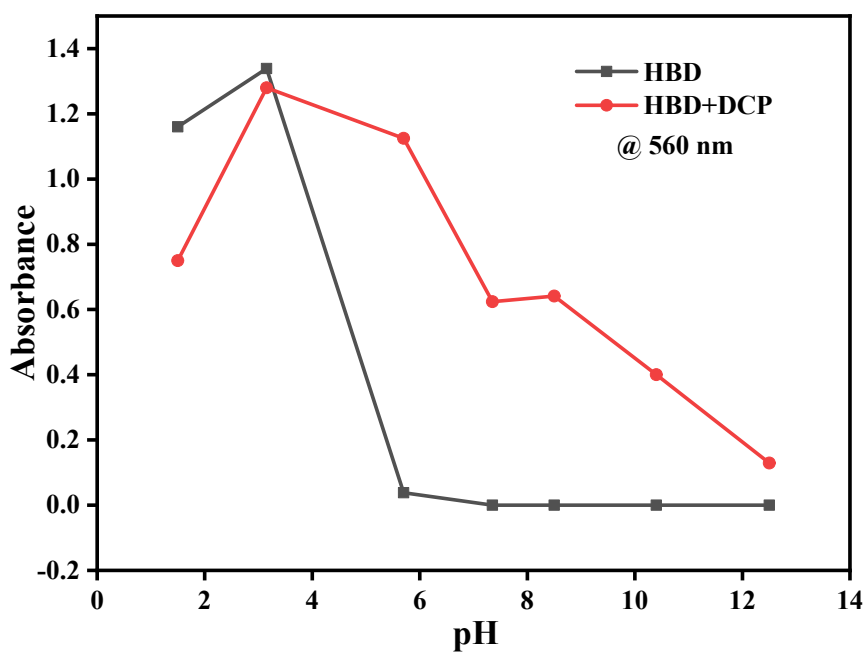

Fig. S5 Change in absorbance at 560 nm of **HBD** (black dots) and **HBD** in the presence of DCP at different pH (red dots)

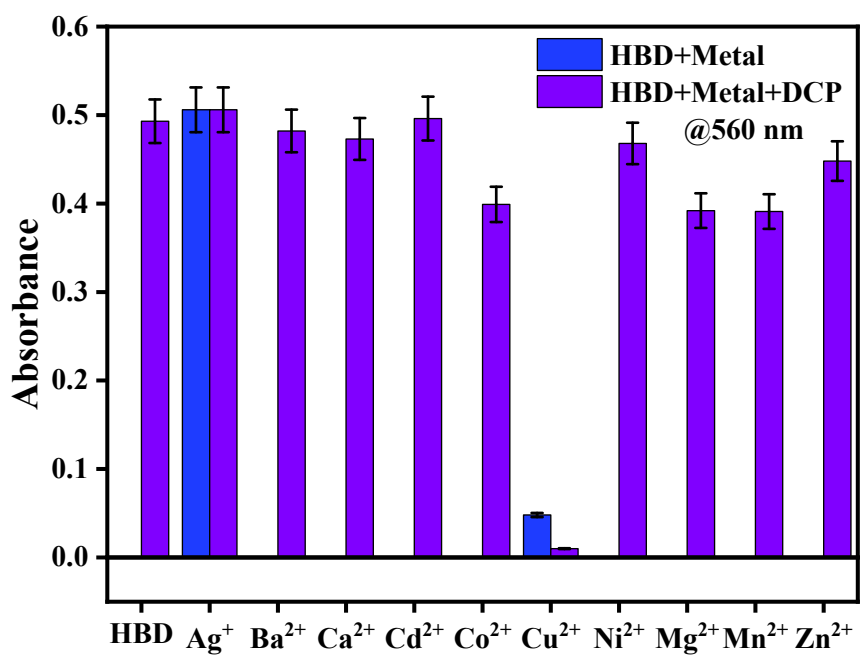

**Fig. S6** Spectrophotometric interference investigation of our probe **HBD** with the various metal ions.

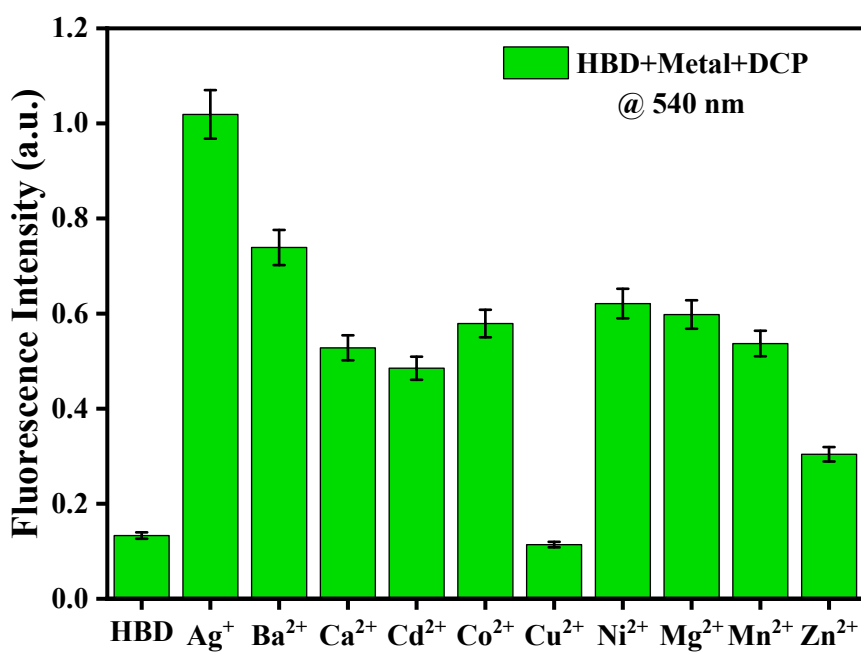

**Fig. S7** Spectrofluorometric interference investigation of our probe **HBD** with the various metal ions.

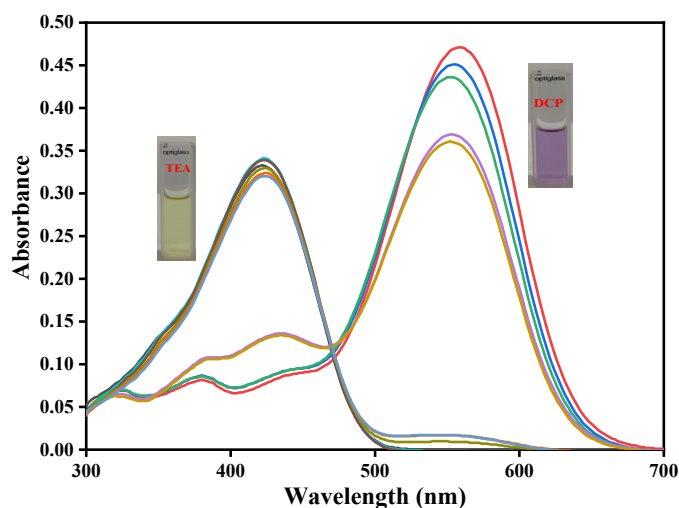

**Fig. S8** Absorbance spectra of **HBD** upon sequential addition of DCP and TEA.

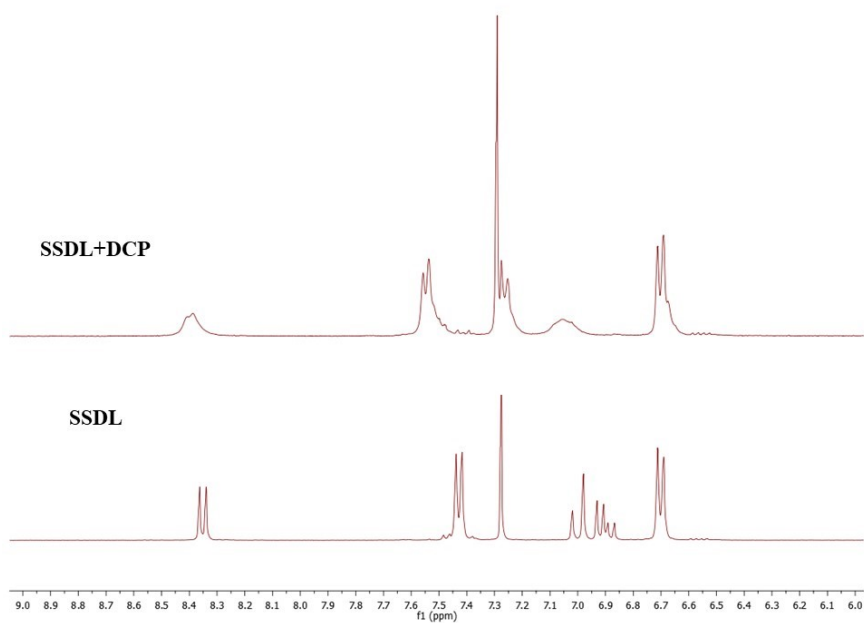

**Fig. S9**  $^1\text{H}$  NMR titration spectra of **HBD** in the absence and presence of DCP.

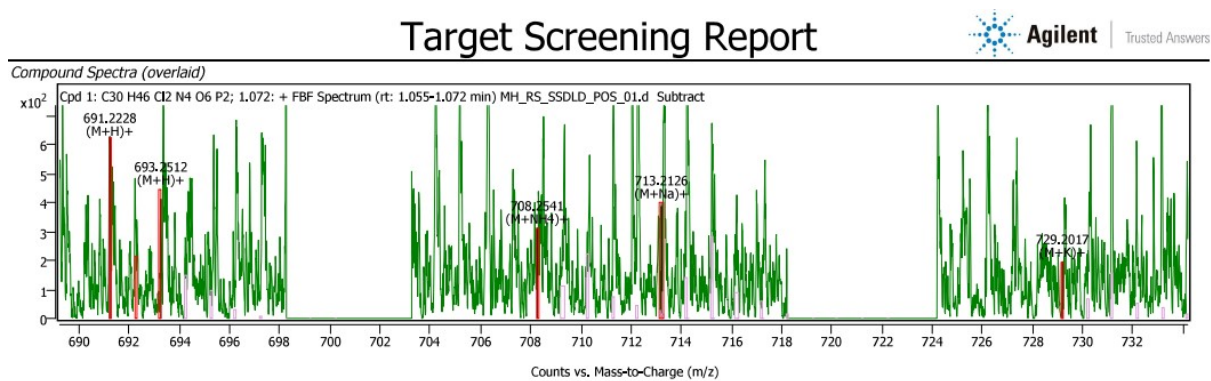

**Fig. S10** HRMS spectra of phosphorylated product **HBD-DCP**.

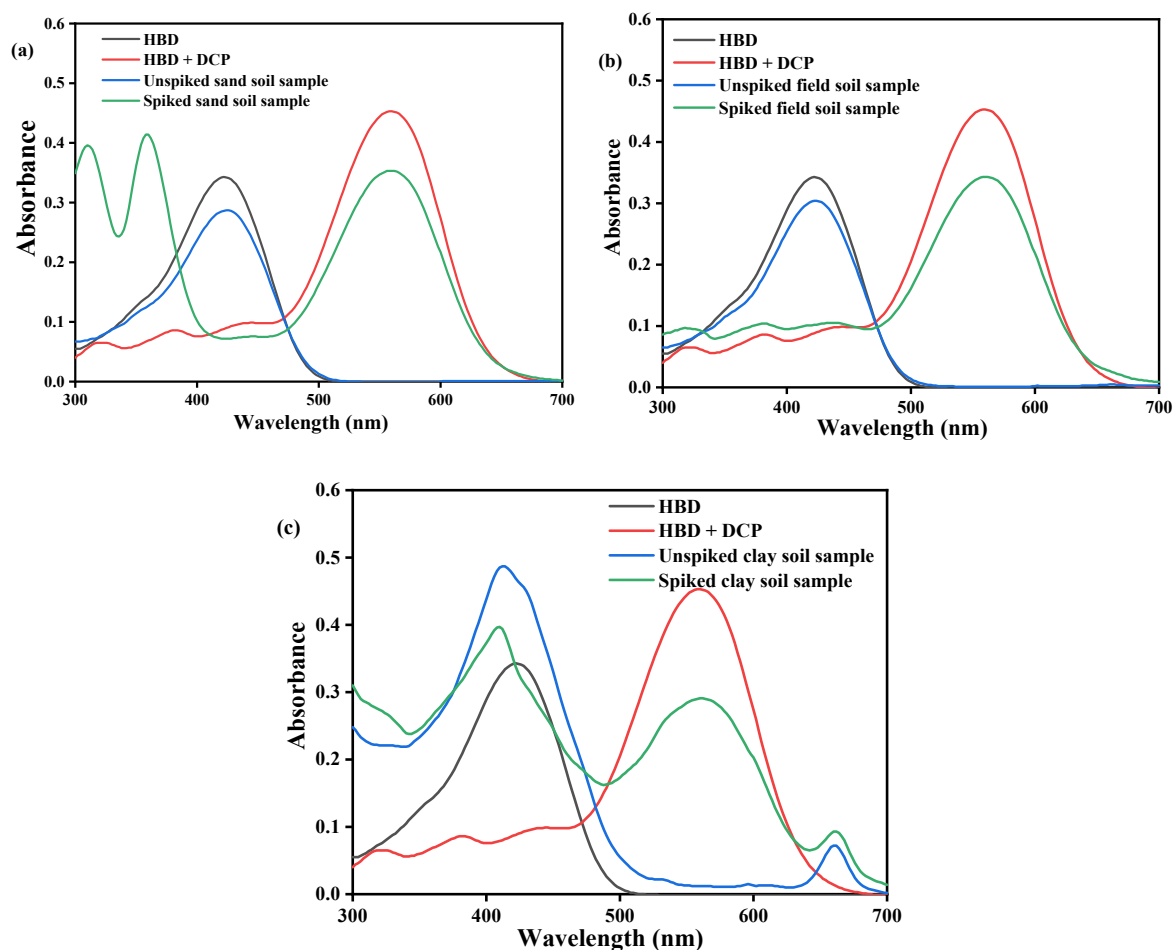

**Fig. S11** Absorbance spectra of **HBD** solution in different spiked and unspiked soil samples such as (a) sand, (b) field, and (c) clay soil, respectively.

**Table S1.** Comparison table of various chemosensors that have been introduced for the detection of DCP in the last few decades with our **HBD**.

| Sensors                        | Type of response             | Response Time | Test kit                 | Detection limit                  | Detection in gaseous phase | Ref. |
|--------------------------------|------------------------------|---------------|--------------------------|----------------------------------|----------------------------|------|
| squaraine-ethanolamine adducts | Colorimetric                 | Not available | Not available            | 3.5 $\mu$ M                      | Not available              | 1    |
| Terpyridine based              | Colorimetric<br>fluorometric | Few seconds   | vapor test<br>Paper test | 0.35 $\mu$ M<br>and 0.30 $\mu$ M | Yes                        | 2    |
| thiourea-based rhodamine       | Colorimetric<br>fluorometric | Not available | No                       | 2 $\mu$ M                        | No                         | 3    |

|                                                  |                                     |                    |                               |                               |               |                 |
|--------------------------------------------------|-------------------------------------|--------------------|-------------------------------|-------------------------------|---------------|-----------------|
| DASA-Derived Polymeric Probe                     | Colorimetric (On-off)               | Within 2 minutes   | vapor test                    | 1mM                           | Yes           | 4               |
| bis-indolyl based chromogenic probe              | Colorimetric                        | Few minutes        | vapor test<br>Paper test      | 10.8 $\mu$ M                  | Yes           | 5               |
| Bifunctional azoaniline based                    | colourimetric                       | Within 1 min       | Not mentioned                 | 0.2 mM                        | Not mentioned | 6               |
| Polymer (BPAm-co-DMA-co-MPDEA)                   | colorimetric                        | Within few mins    | polymeric film                | 18.4 $\mu$ M                  | Yes           | 7               |
| di-methyltin derivative                          | Fluorometric (turn-off)             | Almost 2 minutes   | Yes (Spot Testing Device)     | 0.023 and 0.092 mM            | Yes           | 8               |
| pyrene based turn-on fluorescent polymeric probe | ON/OFF reversible fluorescence      | Few minutes        | Quartz Plate vapor test       | 0.1 mM                        | Yes           | 9               |
| benzothiazole-based                              | Fluorometric                        | Not available      | Not available                 | 0.43 $\mu$ M                  | Not available | 10              |
| Xanthene                                         | Colorimetric, fluorometric (turnon) | Not mentioned      | Not mentioned                 | 1.36 $\mu$ M and 26 $\mu$ M   | NA            | 11              |
| <b>Hydrazine based</b>                           | <b>Colorimetric</b>                 | <b>Few seconds</b> | <b>Paper test, vapor test</b> | <b>0.30 <math>\mu</math>M</b> | <b>Yes</b>    | <b>Our Work</b> |

## References

- 1 J. Zhao, M. Qin, J. You, K. Liu, L. Ding, T. Liu, J. Kong and Y. Fang, *Dye. Pigment.*, 2022, **197**, 109870.
- 2 P. Zheng, Z. Cui, H. Liu, W. Cao, F. Li and M. Zhang, *J. Hazard. Mater.*, 2021, **415**, 125619.
- 3 S. Li, Y. Zheng, W. Chen, M. Zheng, H. Zheng, Z. Zhang, Y. Cui, J. Zhong and C.

- Zhao, *Molecules*, , DOI:10.3390/MOLECULES24050827.
- 4 A. Balamurugan and H. Il Lee, *Macromolecules*, 2016, **49**, 2568–2574.
  - 5 N. Dey, S. Jha and S. Bhattacharya, *Analyst*, 2018, **143**, 528–535.
  - 6 M. Gupta and P. H. il Lee, *Sensors Actuators B Chem.*, 2017, **242**, 977–982.
  - 7 T. N. Annisa, S. H. Jung, M. Gupta, J. Y. Bae, J. M. Park and H. Il Lee, *ACS Appl. Mater. Interfaces*, 2020, **12**, 11055–11062.
  - 8 N. Singh, K. Kumar, N. Srivastav, R. Singh, V. Kaur, J. P. Jasinski and R. J. Butcher, *New J. Chem.*, 2018, **42**, 8756–8764.
  - 9 M. Gupta and H. Il Lee, *undefined*, 2017, **50**, 6888–6895.
  - 10 M. K. Das, T. Mishra, S. Guria, D. Das, J. Sadhukhan, S. Sarker, K. Dutta, A. Adhikary, D. Chattopadhyay and S. S. Adhikari, *New J. Chem.*, 2022, **47**, 250–257.
  - 11 K. C. Behera and B. Bag, *Chem. Commun.*, 2020, **56**, 9308–9311.
